# Supplementary material for: Comparison of thyroid stimulating hormone, free thyroxine, total triiodothyronine, thyroglobulin and peroxidase antibodies measurements by two different platforms
Source: publisher site journal article supplement (doi:10.1515/cclm-2022-0139), 2022-05-05
Supplement: Supplementary file 1 [file j_cclm-2022-0139_suppl.docx]

Supplementary table. Concordance between the TSH assays (Ln(TSHI) and Ln(TSHR)), the FT4 assays (Ln(FT4I) and Ln(FT4R)) , and the TT3 assays (Ln(TT3I) and Ln(TT3R)) according to sex, BMI categories and presence or absence of TPOAb and/or TGAb

| **Subgroups** | **Categories** | **N** | **Ln (TSH)** | **Ln (FT4)** | **Ln (TT3)** |
| --- | --- | --- | --- | --- | --- |
|  |  |  | **ICC3 (95% CI)** | | | |
| Whole sample |  | 301 | 0.914 (0.885 - 0.935) | 0.523 (0.060 - 0.744) | 0.344 (-0.015 - 0.583) |
| Gender | Male | 103 | 0.893 (0.838 - 0.929) | 0.559 (0.020 - 0.790) | 0.316 (-0.015 - 0.557) |
|  | Female | 198 | 0.924 (0.895 - 0.944) | 0.502 (0.069 - 0.722) | 0.354 (-0.055 - 0.753) |
| BMI class | Normal | 159 | 0.911 (0.875 - 0.936) | 0.562 (0.005 - 0.793) | 0.304 (-0.025 - 0.543) |
|  | Overweight | 92 | 0.867 (0.794 - 0.913) | 0.398 (0.072 - 0.619) | 0.305 (-0.022 - 0.549) |
|  | Obese | 50 | 0.959 (0.929 - 0.977) | 0.624 (0.040 - 0.841) | 0.426 (-0.060 - 0.711) |
| TPOAb or TGAb | Negative | 262 | 0.900 (0.869 - 0.923) | 0.463 (0.029 - 0.696) | 0.342 (-0.005 - 0.576) |
|  | Positive | 39 | 0.940 (0.845 - 0.973) | 0.801 (0.271 - 0.926) | 0.536 (-0.196 - 0.808) |

The concordance between the 2 techniques is quantified using the type 3 intraclass concordance coefficient (2-way mixed model) with its 95% confidence interval. The absolute agreement definition was used.
